# Supplementary material
Source: PubMed Central journal article supplement (PMC6664175)
Supplement: supp_RA119.008728_144696_1_supp_333251_prnwlb.pdf [file supp_RA119.008728_144696_1_supp_333251_prnwlb.pdf]

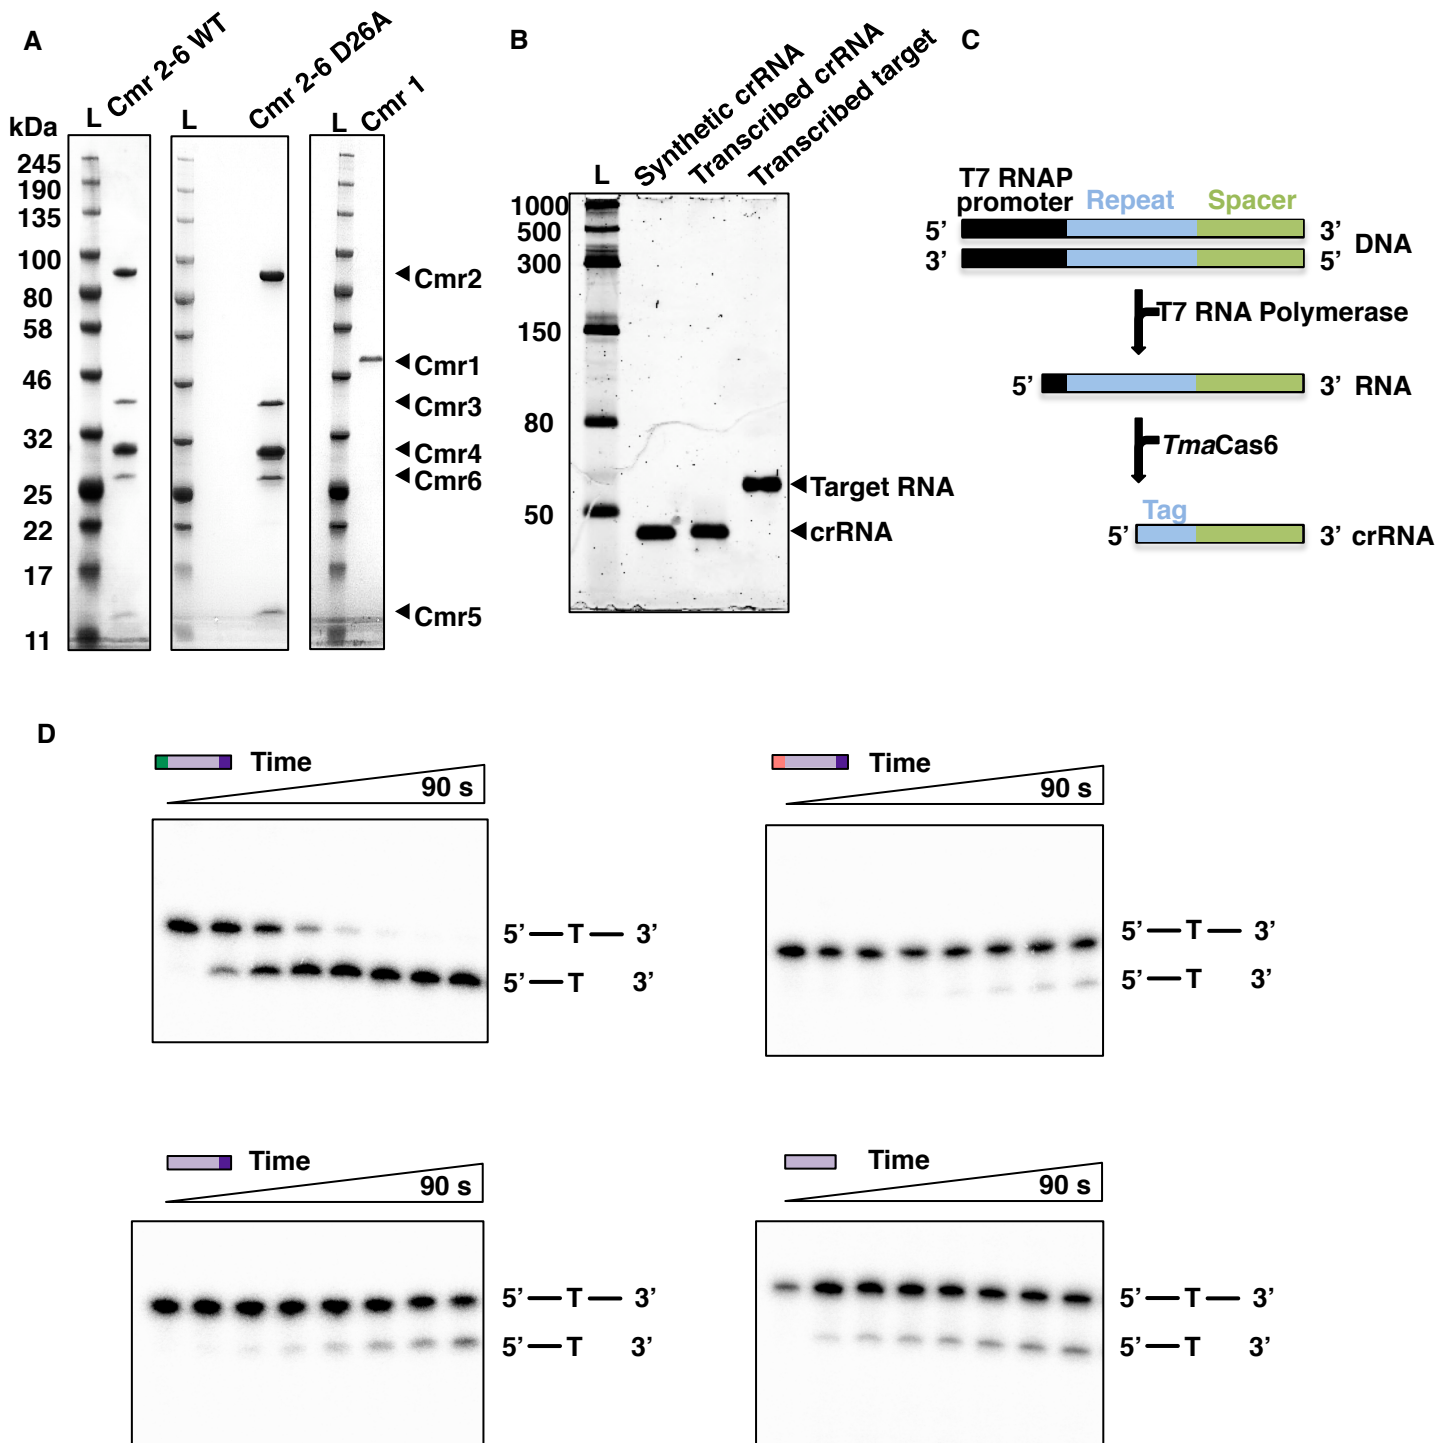

**Figure S1.** (A) SDS-PAGE gels of recombinant *TmaCmr2-6* WT, *TmaCmr2-6* D26A, and *TmaCmr1*. “L” indicates ladder (NEB P7712). (B) Urea-PAGE gel of crRNA and target RNA. “L” indicates ladder (NEB N0364). Synthetic crRNA was included as a control to confirm appropriate size after crRNA transcription and processing by *TmaCas6*. (C) Schematic of crRNA production. A double-stranded DNA was first transcribed by T7 RNA Polymerase and the resulting RNA was processed by *TmaCas6* to produce a mature crRNA consisting of an 8 nt tag and 37 nt spacer. (D) PAGE of DNA cleavage products by the *TmaCmr* complex over time upon activation with RNA targets containing various 3' and 5' flanks. Quantification of these gels is shown in **Fig. 1C**.

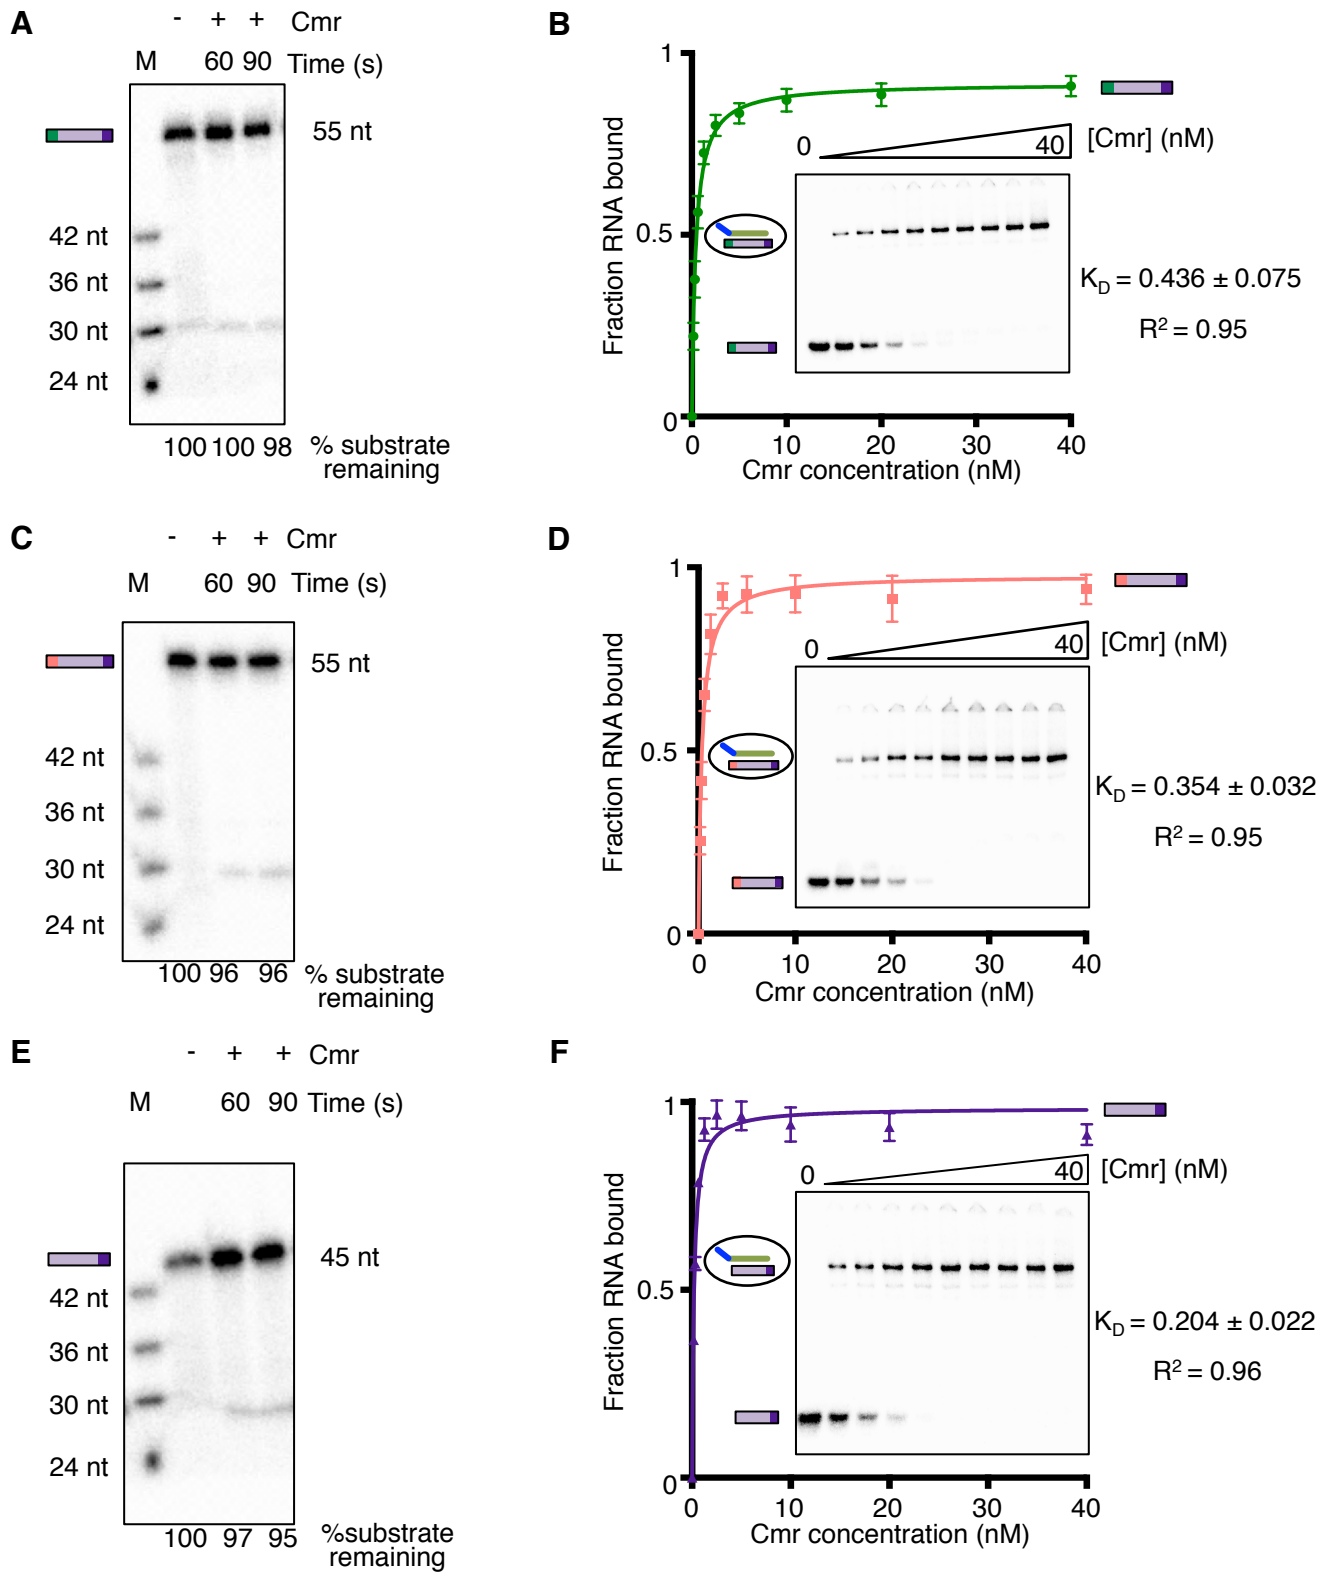

**Figure S2.** Target binding and persistence. Green (A, B) indicates a non-complementary PFS, pink (C, D) indicates an anti-tag PFS, and purple (E, F) indicates no PFS. (A,C,E) Representative Urea-PAGE showing persistence of RNA target after incubation with *TmaCmr* for 60 and 90 seconds under DNA cleavage conditions. “M” indicates marker generated by 5’ radiolabeling expected cleavage products (synthetic) of a 55 nt substrate. (B, D, F) Binding curve with representative EMSA and binding constants of *TmaCmr* with RNA targets.

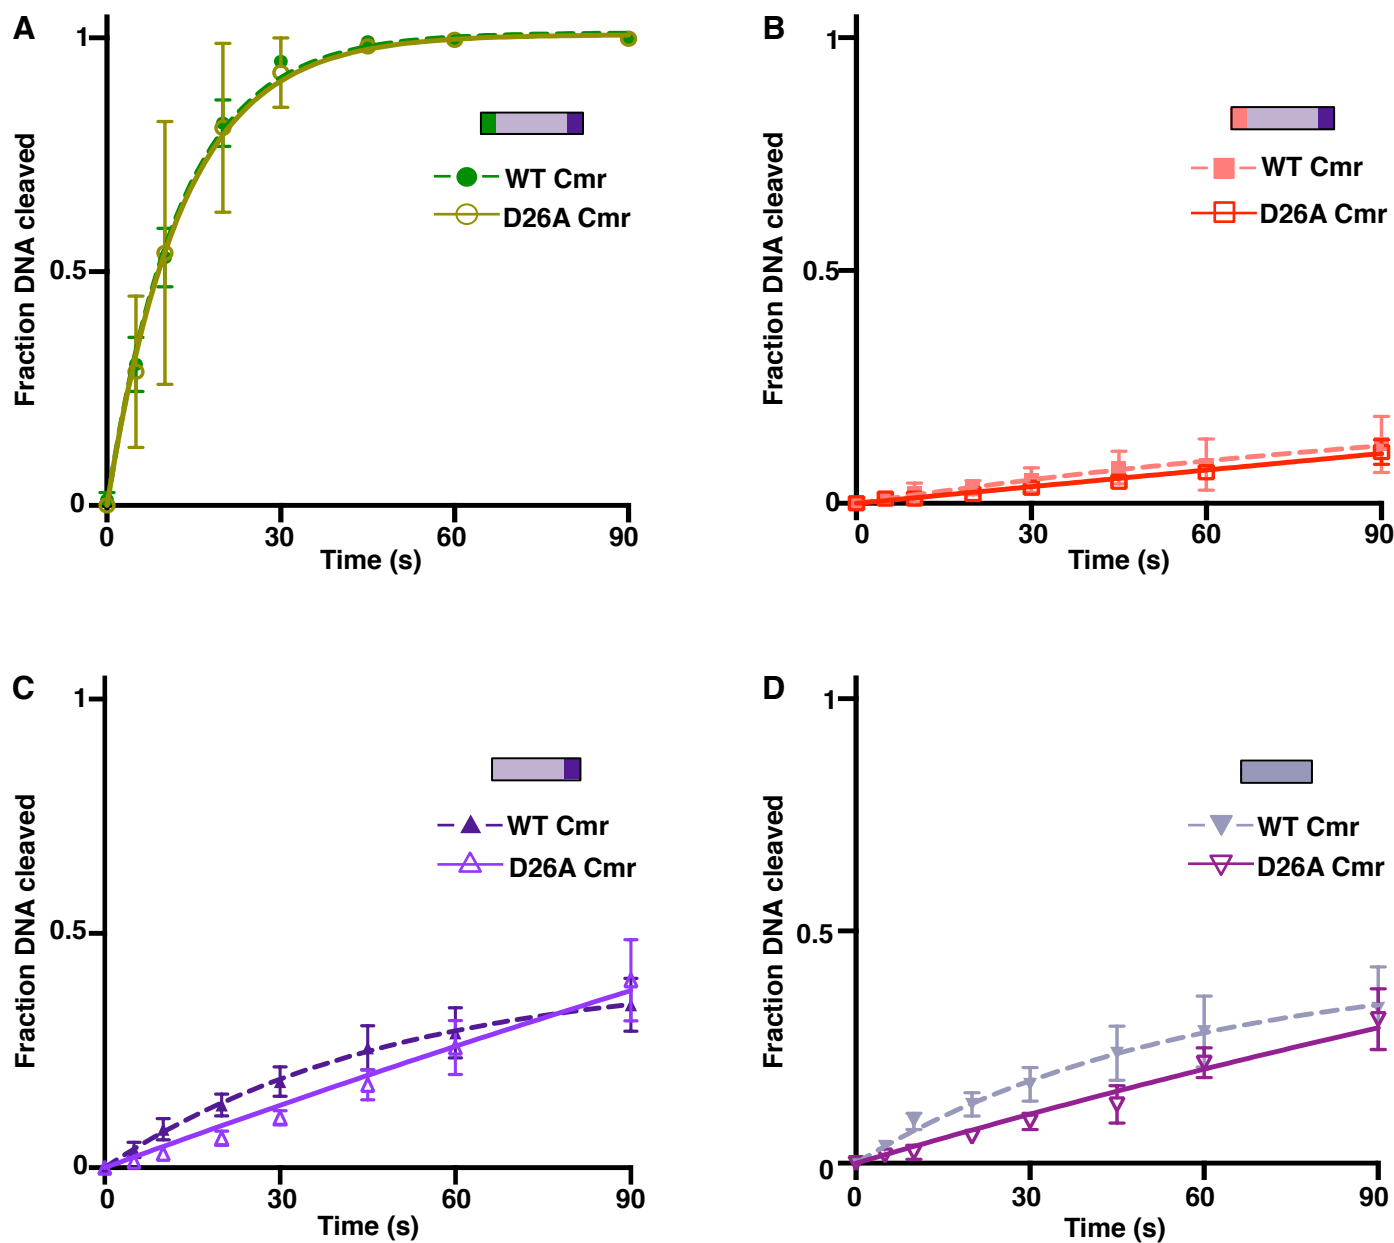

**Figure S3.** Time courses of DNA cleavage with wild-type (dashed lines and filled shapes) and RNA cleavage mutant D26A (solid lines, open shapes) *TmaCmr* complexes upon activation with targets with various PFSs. (A) Target contains noncomplementary PFS. (B) Target contains anti-tag PFS. (C) Target lacks PFS. (D) Target lacks PFS and 5' flank.

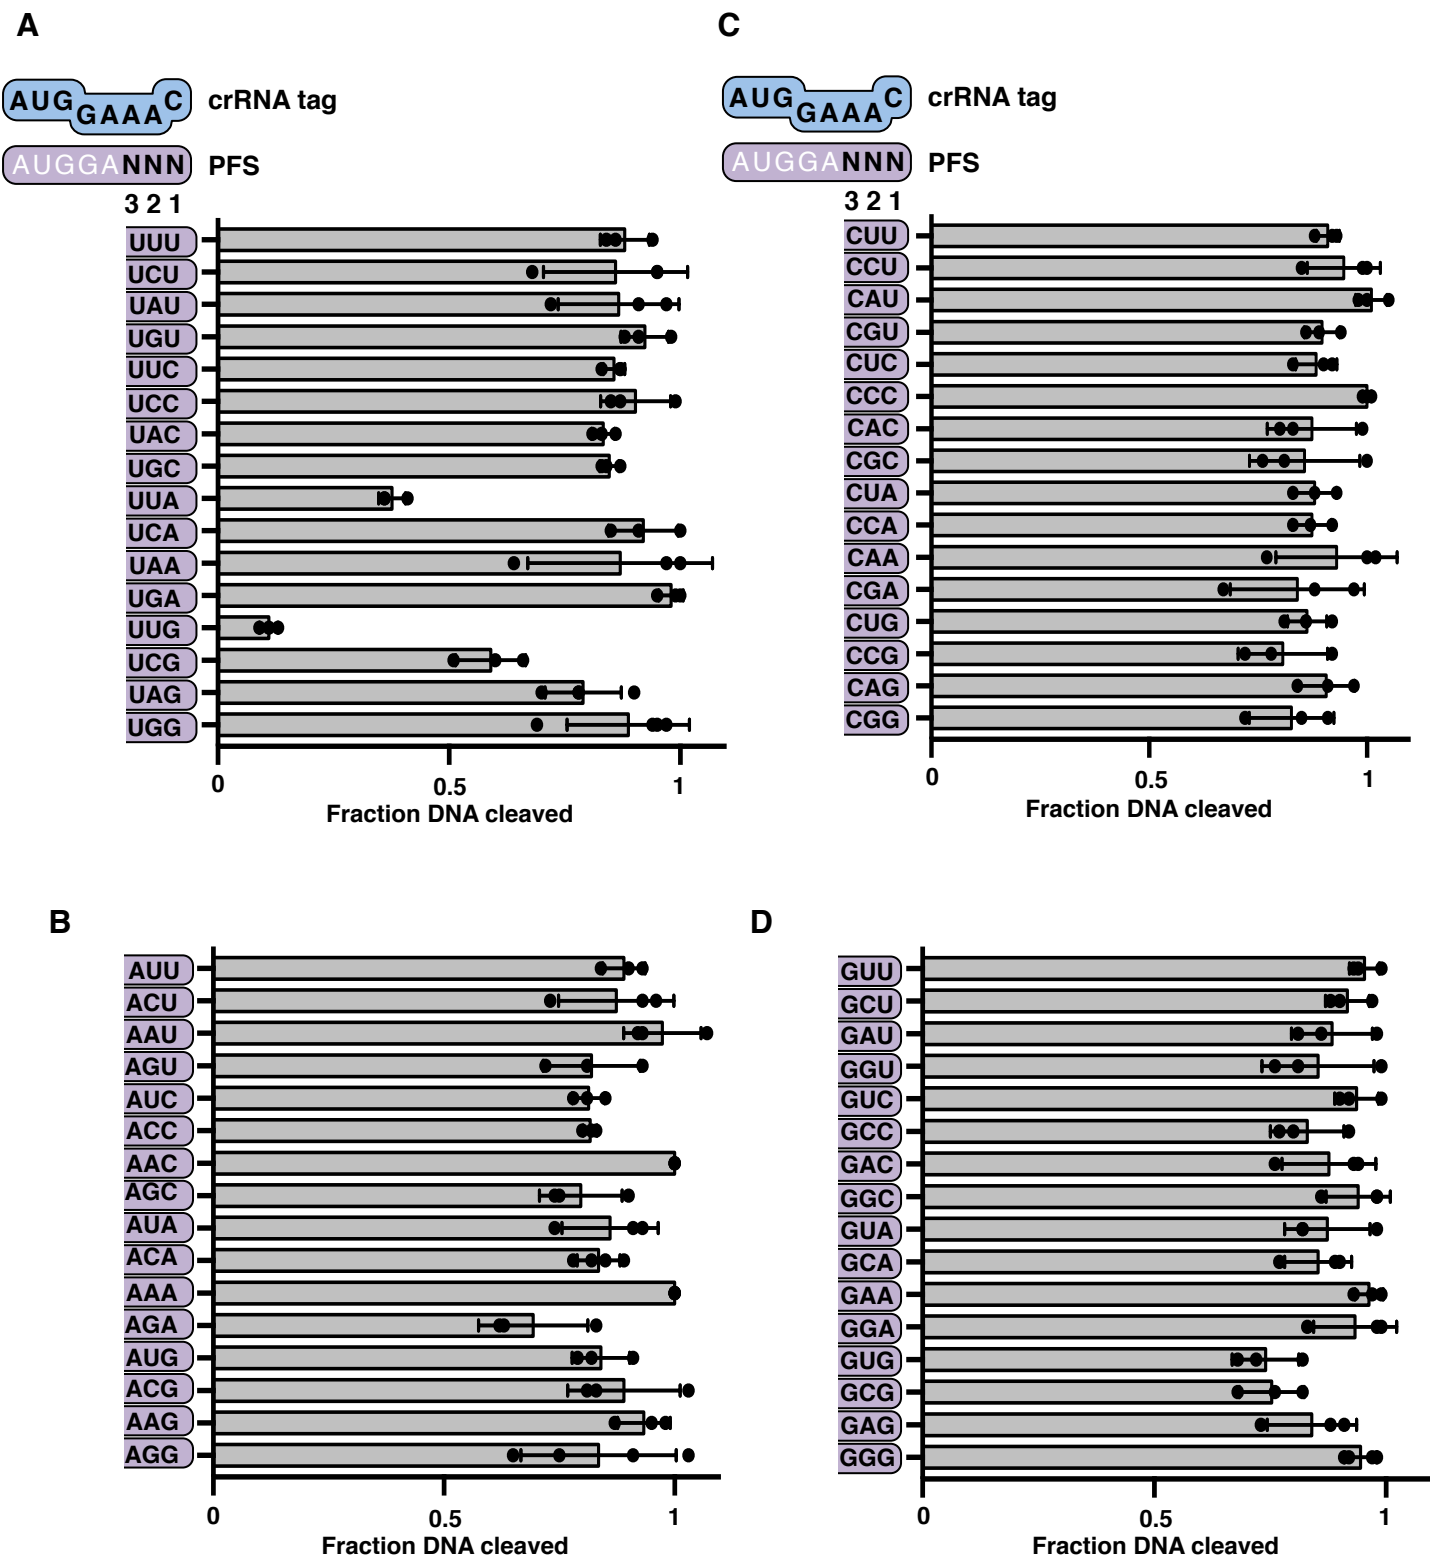

**Figure S4.** Data from Fig. 2B plotted as individual bars with errors. (A,B,C,D) Quantification of DNA cleavage by *TmaCmr* complex upon activation with targets containing all possible sequences in positions -1 to -3. All targets contain noncomplementary sequence of 5'-AGGUA-3' in positions -4 to -8.

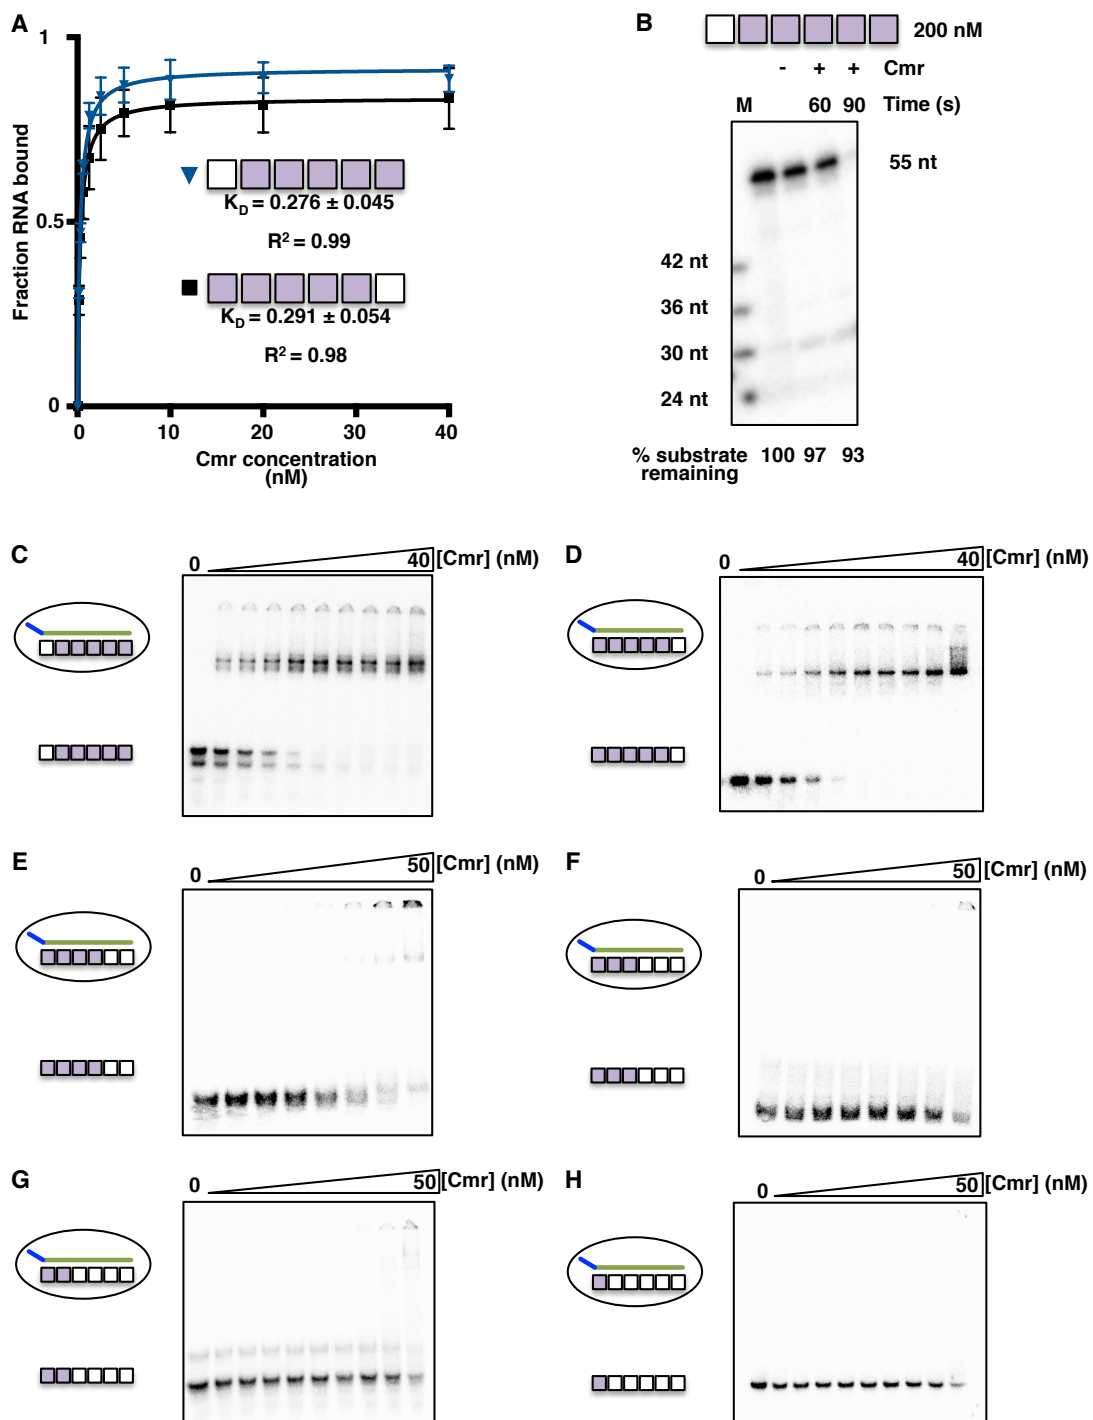

**Figure S5.** Binding and persistence of mismatched targets. (A) Binding curves and binding constants for *TmaCmr* with Segment 1 and Segment 6 mismatched targets. (B) Representative Urea-PAGE showing persistence of RNA target after incubation with *TmaCmr* for 60 and 90 seconds under DNA cleavage conditions. M indicates marker generated by 5' radiolabeling expected cleavage products (synthetic) of a 55 nt substrate. (C-H) Representative EMSAs of *TmaCmr* with targets containing mismatched segment 1 (C), segment 6 (D), segments 5-6 (E), segments 4-6 (F), segments 3-6 (G), or segments 2-6 (H).
